# Supplementary material for: Beyond the ‘big four’: Venom profiling of the medically important yet neglected Indian snakes reveals disturbing antivenom deficiencies
Source: PubMed Central journal article supplement (PMC6894822; doi:10.1371/journal.pntd.0007899), 2019-12-05

**S6. Fig**

**Day 1:** Severe ecchymosis and swelling

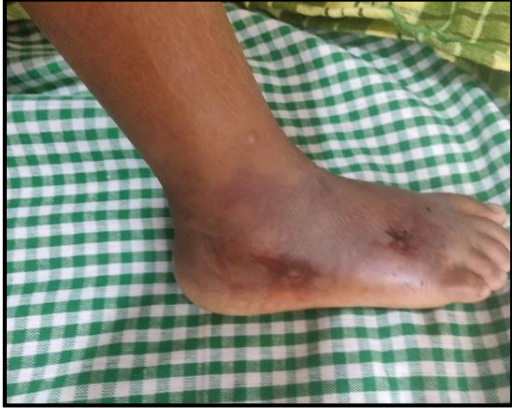

**Day 2:** Formation of blisters

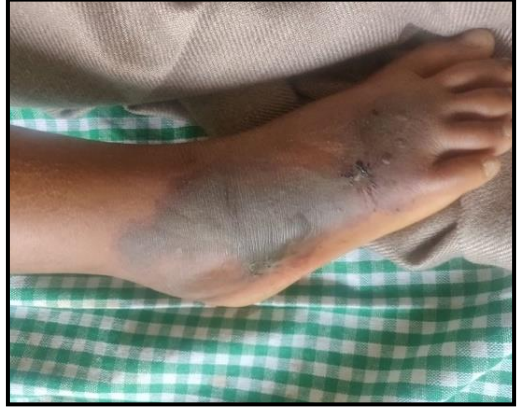

**Day 3:** Onset of necrosis

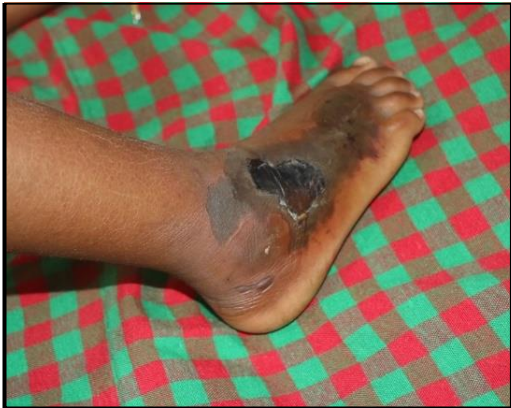

**Day 4/5:** Necrosis

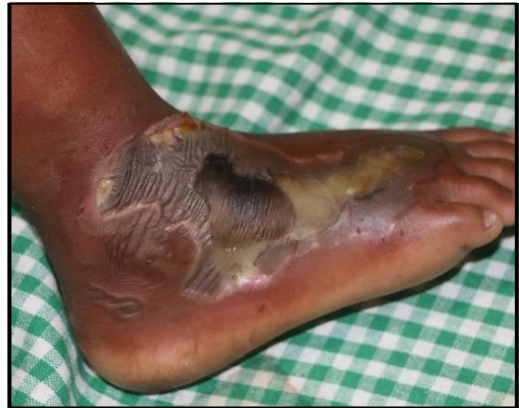

Supplement: pntd.0007899.s006.pdf [file pntd.0007899.s006.pdf]
